# Supplementary material for: Controlled fabrication of flower–like ZnO–Fe2O3 nanostructured films with excellent lithium storage properties through a partly sacrificed template method
Source: Royal Society of Chemistry journal article supplement (doi:10.1039/c2jm30277b), 2012-01-01
Supplement: c2jm30277b.pdf [file c2jm30277b.pdf]

## Supplementary information

### Controlled fabrication of flower-like ZnO-Fe<sub>2</sub>O<sub>3</sub> nanostructured films with excellent lithium storage properties through a partly sacrificed template method

Liming Qin, Qing Zhu, Guorui Li, Fatang Liu, Qinmin Pan\*

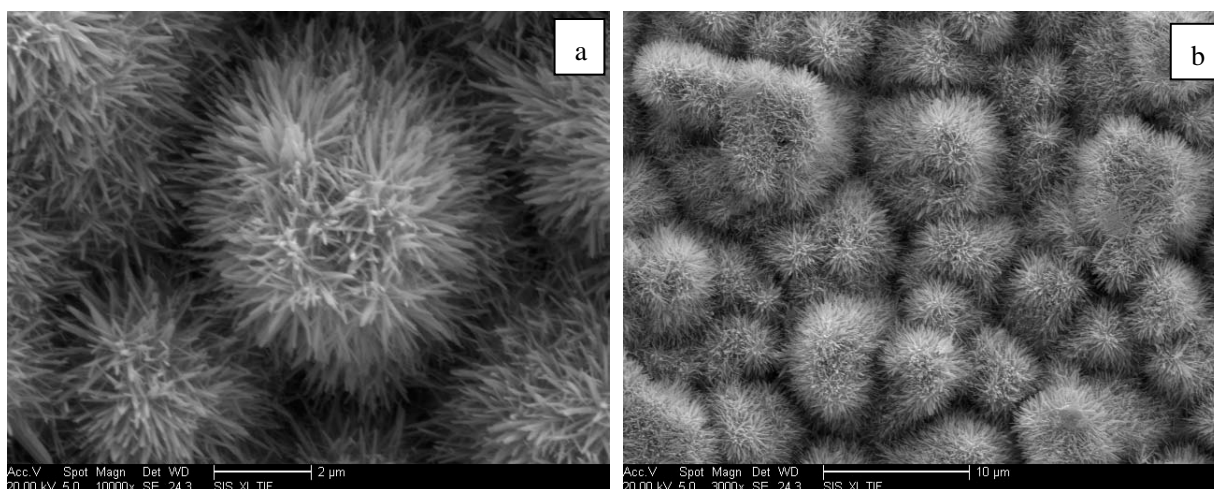

**Fig. S1** SEM images of dandelion-like ZnO nanorod arrays.

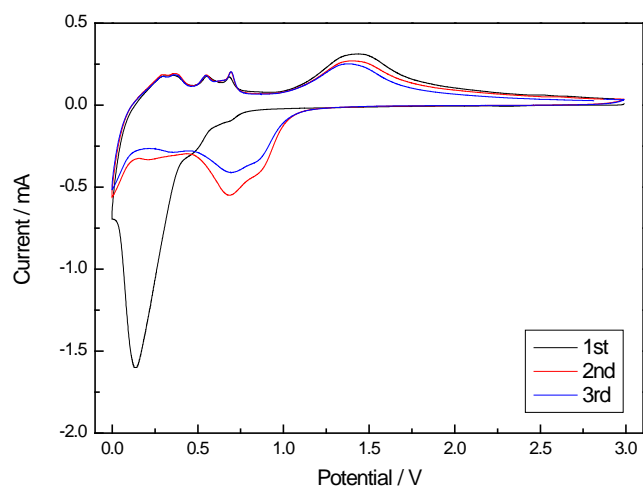

**Fig. S2** Cyclic voltammograms of dandelion-like ZnO nanorod arrays as anodes of LIBs at a scan rate of 0.3 mV s<sup>-1</sup>.

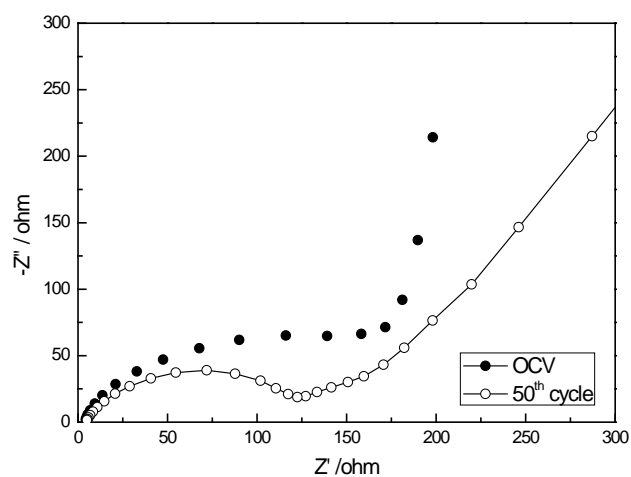

**Fig. S3** Electrochemical impedance spectra recorded on dandelion-like ZnO nanorod arrays at open circuit voltage (OCV) and after lithiation–delithiation for 50 cycles.
